# Supplementary material for: Low Habitual Dietary Calcium and Linear Growth from Adolescence to Young Adulthood: results from the China Health and Nutrition Survey
Source: PubMed Central journal article supplement (PMC5567300; doi:10.1038/s41598-017-08943-6), 2017-08-22
Supplement: 41598_2017_8943_MOESM1_ESM.pdf [file 41598_2017_8943_MOESM1_ESM.pdf]

**Low Habitual Dietary Calcium and Linear Growth from Adolescence to Young**

**Adulthood: results from the China Health and Nutrition Survey**

Aiping Fang,<sup>1,2</sup> Keji Li,<sup>2</sup> He Li,<sup>2</sup> Meihan Guo,<sup>2</sup> Jingjing He,<sup>2</sup> Xin Shen,<sup>2</sup> Jie Song<sup>2</sup>

Supplementary Information

## Supplemental Tables

Supplemental Table S1. Baseline characteristics of the growth cohort before and after excluding ineligible participants

|                                          | Boys                     |                         |          | Girls                    |                        |          |
|------------------------------------------|--------------------------|-------------------------|----------|--------------------------|------------------------|----------|
|                                          | Before ( <i>n</i> =1539) | After ( <i>n</i> =1165) | <i>P</i> | Before ( <i>n</i> =1150) | After ( <i>n</i> =854) | <i>P</i> |
| Age (years) <sup>a</sup>                 | 15.5(2.3)                | 15.4(2.3)               | 0.2766   | 13.6(2.2)                | 13.5(2.3)              | 0.3645   |
| Height (cm) <sup>a</sup>                 | 157.8(12.0)              | 157.3(12.0)             | 0.2760   | 147.2(10.6)              | 146.7(10.8)            | 0.3238   |
| Weight (kg) <sup>a</sup>                 | 47.4(11.5)               | 47.0(11.4)              | 0.3156   | 39.4(9.4)                | 39.1(9.4)              | 0.5158   |
| BMI (kg/m <sup>2</sup> ) <sup>a</sup>    | 18.8(2.6)                | 18.7(2.6)               | 0.3390   | 18.0(2.7)                | 17.9(2.7)              | 0.7306   |
| HAZ <sup>a</sup>                         | -1.22(1.12)              | -1.24(1.13)             | 0.6368   | -1.17(1.10)              | -1.18(1.11)            | 0.9445   |
| Paternal height (cm) <sup>a</sup>        | 165.0(6.3)               | 165.2(6.3)              | 0.5171   | 165.4(6.4)               | 165.6(6.4)             | 0.5731   |
| Maternal height (cm) <sup>a</sup>        | 154.4(6.0)               | 154.6(5.9)              | 0.3645   | 154.6(5.9)               | 154.9(6.0)             | 0.2609   |
| Daily dietary intake <sup>d</sup>        |                          |                         |          |                          |                        |          |
| Total energy (kcal) <sup>a</sup>         | 2532(737)                | 2522(673)               | 0.7209   | 2065(563)                | 2061(534)              | 0.8678   |
| Protein (g) <sup>a</sup>                 | 74.9(25.2)               | 75.0(24.5)              | 0.9022   | 62.4(19.9)               | 62.2(19.1)             | 0.8648   |
| Vitamin A (ugRE) <sup>b</sup>            | 341(173,615)             | 343(184,610)            | 0.8957   | 312(153,553)             | 291(146,528)           | 0.1484   |
| Calcium (mg) <sup>a</sup>                | 417(220)                 | 415(199)                | 0.8077   | 360(196)                 | 349(166)               | 0.1778   |
| Iron (mg) <sup>a</sup>                   | 23.0(10.9)               | 23.3(11.7)              | 0.4899   | 19.3(8.3)                | 19.6(8.7)              | 0.4484   |
| Zinc (mg) <sup>a</sup>                   | 12.0(3.9)                | 12.0(3.6)               | 0.9816   | 9.9(3.1)                 | 9.8(3.0)               | 0.7376   |
| Urbanization index <sup>a</sup>          | 47.2(17.8)               | 47.9(17.7)              | 0.2921   | 48.4(18.3)               | 49.8(17.9)             | 0.0896   |
| Latitude <sup>a</sup>                    | 31.3(6.2)                | 31.3(6.2)               | 0.8593   | 31.9(6.2)                | 32.2(6.3)              | 0.1984   |
| DNR (kWh/m <sup>2</sup> /d) <sup>a</sup> | 3.46(1.04)               | 3.47(1.06)              | 0.7538   | 3.57(1.05)               | 3.60(1.07)             | 0.4851   |
| Year of birth <sup>b</sup>               | 1979(1975,1983)          | 1979(1975,1984)         | 0.6201   | 1980(1977,1985)          | 1981(1977,1986)        | 0.1667   |
| Wave at entry <sup>c</sup>               |                          |                         | 0.7008   |                          |                        | 0.5615   |
| 1989-1993                                | 883(59.4)                | 709(60.9)               |          | 697(62.2)                | 512(60.0)              |          |
| 1997-2000                                | 512(34.4)                | 390(33.5)               |          | 354(31.6)                | 289(33.8)              |          |

|                                     | Boys                     |                         |          | Girls                    |                        |          |
|-------------------------------------|--------------------------|-------------------------|----------|--------------------------|------------------------|----------|
|                                     | Before ( <i>n</i> =1539) | After ( <i>n</i> =1165) | <i>P</i> | Before ( <i>n</i> =1150) | After ( <i>n</i> =854) | <i>P</i> |
| 2004-2009                           | 92(6.2)                  | 66(5.7)                 |          | 70(6.2)                  | 53(6.2)                |          |
| Stratum <sup>c</sup>                |                          |                         | 0.7697   |                          |                        | 0.7084   |
| Rural                               | 1166(78.4)               | 908(77.9)               |          | 847(75.6)                | 639(74.8)              |          |
| Urban                               | 321(21.6)                | 257(22.1)               |          | 274(24.4)                | 215(25.2)              |          |
| Household income level <sup>c</sup> |                          |                         | 0.9523   |                          |                        | 0.5364   |
| Low                                 | 523(35.2)                | 408(35.0)               |          | 443(39.5)                | 319(37.4)              |          |
| Medium                              | 651(43.8)                | 506(43.4)               |          | 466(41.6)                | 360(42.2)              |          |
| High                                | 313(21.0)                | 251(21.5)               |          | 212(18.9)                | 175(20.5)              |          |

<sup>a</sup>Data shown is mean(SD), and two-independent samples t tests were used to compare the characteristics before and after excluding ineligible participants.

<sup>b</sup>Data shown is median(IQR), and two-independent samples nonparametric tests were used to compare the characteristics before and after excluding ineligible participants.

<sup>c</sup>Data shown is *n*(%), and chi-square tests were used to compare the characteristics before and after excluding ineligible participants.

<sup>d</sup>Energy adjusted average nutrient intakes during adolescence were estimated from a mean number of 1.8 three-day 24-hour dietary recalls (range: 1-3) obtained during age 12-19 in boys and 10-17 years in girls using the residual method after log transformation.

BMI: body mass index; HAZ: height-for-age *z*-score; DNR: annual average direct normal radiation; IQR: interquartile range.

Supplemental Table S2. Mean daily food consumption during adolescence in Chinese boys and girls

|                              | Boys ( <i>n</i> =1165) | Girls ( <i>n</i> =854) |
|------------------------------|------------------------|------------------------|
| Plant foods <sup>a</sup>     |                        |                        |
| Cereals (g/1000 kcal)        | 196.0(1.2)             | 191.8(1.4)             |
| Vegetables (g/1000 kcal)     | 122.6(2.1)             | 129.3(2.6)             |
| Tubers (g/1000 kcal)         | 14.9(1.0)              | 17.0(1.3)              |
| Vegetable oil (g/1000 kcal)  | 9.1(0.2)               | 9.7(0.3)               |
| Soybean (g/1000 kcal)        | 5.9(0.3)               | 6.4(0.3)               |
| Fruit (g/1000 kcal)          | 5.3(0.5)               | 9.0(1.0)               |
| Mixed beans (g/1000 kcal)    | 2.6(0.3)               | 2.2(0.3)               |
| Nuts and seeds (g/1000 kcal) | 0.7(0.1)               | 0.8(0.1)               |
| Animal foods <sup>a</sup>    |                        |                        |
| Meat (g/1000 kcal)           | 24.6(0.7)              | 24.8(0.8)              |
| Eggs (g/1000 kcal)           | 6.2(0.3)               | 7.7(0.4)               |
| Seafood (g/1000 kcal)        | 5.9(0.3)               | 6.5(0.4)               |
| Animal oil (g/1000 kcal)     | 4.0(0.2)               | 3.8(0.2)               |
| Poultry (g/1000 kcal)        | 2.9(0.2)               | 2.8(0.3)               |
| Milk (g/1000 kcal)           | 2.8(0.4)               | 3.3(0.6)               |

<sup>a</sup> Data shown is mean(SE).

Supplemental Table S3. Mean dietary protein and calcium from main food sources during adolescence in Chinese boys and girls

|              | Boys ( <i>n</i> =1165)   |      |                           |      | Girls ( <i>n</i> =854)   |      |                           |      |
|--------------|--------------------------|------|---------------------------|------|--------------------------|------|---------------------------|------|
|              | Protein                  |      | Calcium                   |      | Protein                  |      | Calcium                   |      |
|              | g/1000 kcal <sup>a</sup> | %    | mg/1000 kcal <sup>a</sup> | %    | g/1000 kcal <sup>a</sup> | %    | mg/1000 kcal <sup>a</sup> | %    |
| Plant foods  | 23.6 (0.2)               | 80.2 | 152.6 (1.8)               | 92.0 | 23.7 (0.2)               | 79.3 | 155.8 (2.1)               | 91.4 |
| Cereals      | 17.7(0.1)                | 60.6 | 34.3(0.6)                 | 23.3 | 17.4(0.2)                | 58.7 | 35.1(0.7)                 | 23.1 |
| Vegetables   | 1.9(0.03)                | 6.7  | 72.9(1.6)                 | 42.5 | 2.1(0.04)                | 7.1  | 73.6(1.9)                 | 41.6 |
| Soybean      | 2.1(0.1)                 | 6.4  | 23.1(0.9)                 | 12.7 | 2.2(0.1)                 | 6.9  | 25.2(1.2)                 | 13.5 |
| Mixed beans  | 0.6(0.1)                 | 1.8  | 3.6(0.4)                  | 2.0  | 0.5(0.1)                 | 1.5  | 2.7(0.4)                  | 1.6  |
| Tubers       | 0.3(0.02)                | 0.9  | 2.1(0.2)                  | 1.4  | 0.3(0.02)                | 1.0  | 2.1(0.2)                  | 1.4  |
| Animal foods | 6.2 (0.2)                | 19.6 | 13.3 (0.7)                | 7.7  | 6.5 (0.2)                | 20.3 | 15.5 (1.0)                | 8.2  |
| Meat         | 3.7(0.1)                 | 11.9 | 1.8(0.1)                  | 1.2  | 3.8(0.1)                 | 11.9 | 1.8(0.1)                  | 1.2  |
| Seafood      | 1.0(0.1)                 | 3.1  | 4.8(0.4)                  | 2.7  | 1.1(0.1)                 | 3.4  | 5.5(0.5)                  | 2.8  |
| Eggs         | 0.8(0.04)                | 2.5  | 3.4(0.2)                  | 2.1  | 1.0(0.05)                | 3.2  | 4.1(0.2)                  | 2.5  |
| Poultry      | 0.5(0.04)                | 1.6  | 0.4(0.04)                 | 0.3  | 0.5(0.1)                 | 1.5  | 0.4(0.05)                 | 0.2  |
| Milk         | 0.1(0.01)                | 0.3  | 2.8(0.5)                  | 1.3  | 0.1(0.02)                | 0.3  | 3.6(0.7)                  | 1.4  |

<sup>a</sup> Data shown is mean(SE).

Supplemental Table S4. Distribution of percentage of mean dietary protein and calcium from plant foods during adolescence in Chinese boys and girls

|              | Percentage of the nutrient from plant foods <sup>a</sup> |         |           |            |
|--------------|----------------------------------------------------------|---------|-----------|------------|
|              | <25%                                                     | 25%~50% | 50%-75%   | ≥75%       |
| <b>Boys</b>  |                                                          |         |           |            |
| Protein      | 0(0.0)                                                   | 53(4.5) | 378(32.5) | 734(63.0)  |
| Calcium      | 1(0.1)                                                   | 16(1.4) | 70(6.0)   | 1078(92.5) |
| <b>Girls</b> |                                                          |         |           |            |
| Protein      | 0(0.0)                                                   | 49(5.7) | 280(32.8) | 525(61.5)  |
| Calcium      | 0(0.0)                                                   | 16(1.9) | 53(6.2)   | 785(91.9)  |

<sup>a</sup> Data shown is *n*(%).

Supplemental Table S5. Linear regression analysis of energy and energy adjusted nutrient intakes and participants' age during adolescence in Chinese boys and girls

|                        | <i>B</i> | <i>SE</i> | <i>t</i> | <i>P</i> | <i>R</i> <sup>2</sup> | adjusted <i>R</i> <sup>2</sup> |
|------------------------|----------|-----------|----------|----------|-----------------------|--------------------------------|
| Boys                   |          |           |          |          |                       |                                |
| Total energy           | 73.85    | 6.57      | 11.23    | <.0001   | 0.0636                | 0.0631                         |
| Protein <sup>a</sup>   | -0.06    | 0.14      | -0.45    | 0.65     | 0.654                 | -0.0004                        |
| Vitamin A <sup>a</sup> | 7.76     | 7.73      | 1.00     | 0.32     | 0.316                 | <0.0001                        |
| Calcium <sup>a</sup>   | -0.37    | 1.86      | -0.20    | 0.84     | 0.840                 | -0.0005                        |
| Iron <sup>a</sup>      | 0.08     | 0.10      | 0.84     | 0.40     | 0.399                 | -0.0002                        |
| Zinc <sup>a</sup>      | 0.03     | 0.02      | 1.39     | 0.17     | 0.166                 | 0.0005                         |
| Girls                  |          |           |          |          |                       |                                |
| Total energy           | 32.22    | 6.20      | 5.20     | <.0001   | <.0001                | 0.0181                         |
| Protein <sup>a</sup>   | 0.17     | 0.14      | 1.16     | 0.25     | 0.247                 | 0.0002                         |
| Vitamin A <sup>a</sup> | -0.81    | 8.09      | -0.10    | 0.92     | 0.921                 | -0.0007                        |
| Calcium <sup>a</sup>   | 1.86     | 1.88      | 0.99     | 0.32     | 0.324                 | <0.0001                        |
| Iron <sup>a</sup>      | -0.02    | 0.08      | -0.24    | 0.81     | 0.811                 | -0.0007                        |
| Zinc <sup>a</sup>      | 0.02     | 0.02      | 0.75     | 0.46     | 0.456                 | -0.0003                        |

<sup>a</sup>Energy adjusted nutrient intakes were estimated with dietary records from each survey during adolescence using the residual method.
